# Supplementary material for: A role for keratins in supporting mitochondrial organization and function in skin keratinocytes
Source: bioRxiv or medRxiv preprint supplement (doi:10.1101/822403), 2020-03-10
Supplement: Supplementary file [file media-1.pdf]

## Supplemental Information

**Title:** A role for keratins in supporting mitochondrial organization and function in skin keratinocytes

**Authors:** Kaylee Steen, Desu Chen, Fengrong Wang, Ritankar Majumdar, Song Chen, Surinder Kumar, David B. Lombard, Roberto Weiger, Carole A. Parent, and Pierre A. Coulombe

### List of elements:

**Supplemental Figure 1.** Low-magnification surveys of epoxy-embedded E18.5 back skin tissue sections (1  $\mu$ m thick) from *WT* and *Krt6a/Krt6b* null mouse littermates. Bars equal 50  $\mu$ m.

**Supplemental Figure 2.** Measurement of ROS using the Abcam DCFDA cellular ROS detection assay kit. (A) Skin keratinocytes were isolated from P1 *WT* and *Krt6a/Krt6b* null littermates and  $5 \times 10^4$  cells were seeded in a 96-well plate for primary. The following day cells were given fresh media and 24 hours later, cells were labeled with DCFDA dye and Tert-Butyl Hydrogen Peroxide to induce oxidative stress. (B) Keratinocytes were cultured from *WT* and *Krt16* null littermates and cultured as described in (A). (C) Spontaneously immortalized keratinocytes from P1 *WT* and *Krt16* null mice were seeded at a density of  $2.5 \times 10^4$  cells per well and assayed as described in (A). D=DCFDA, T=Tert-Butyl Hydrogen Peroxide. n= 3 independent experiments. Student's t test, significance set at  $p < 0.05$ .

**Supplemental Figure 3.** Data shown are derived from the experiments reported in Supplemental Videos 1-4, but represented as mitochondrial speed as a function of mitochondrial size. Also related to data presented in Figure 4.

**Supplemental Video 1.** Representative movie of keratinocytes in primary culture, isolated from the *WT* littermates of *Krt6a/Krt6b* null mice. Related to data presented in Figure 4 and Suppl. Figure 3. See main text for details.

**Supplemental Video 2.** Representative movie of keratinocytes in primary culture, isolated from *Krt6a/Krt6b* null mice. Related to data presented in Figure 4 and Suppl. Figure 3. See main text for details.

**Supplemental Video 3.** Representative movie of keratinocytes in primary culture, isolated from the *WT* littermates of *Krt16* null mice. Related to data presented in Figure 4 and Suppl. Figure 3. See main text for details.

**Supplemental Video 4.** Representative movie of keratinocytes in primary culture, isolated from *Krt16* null mice. Related to data presented in Figure 4 and Suppl. Figure 3. See main text for details.

**Supplemental Table 1.** Forward and reverse oligonucleotide primers used for RT-qPCR assays.

Supplemental Figure 1. Steen et al.

*Krt6a/Krt6b* WT E18.5

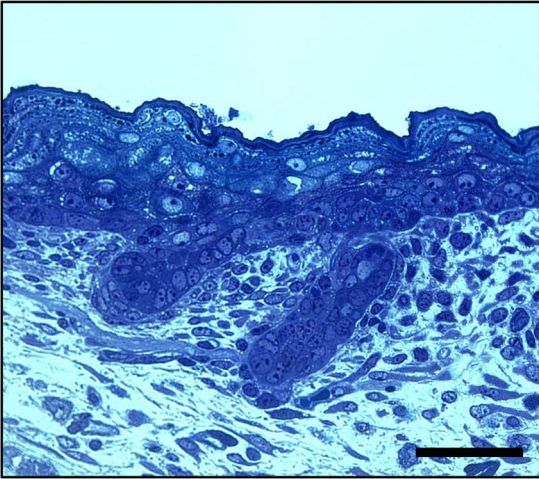

*Krt6a/Krt6b* null E18.5

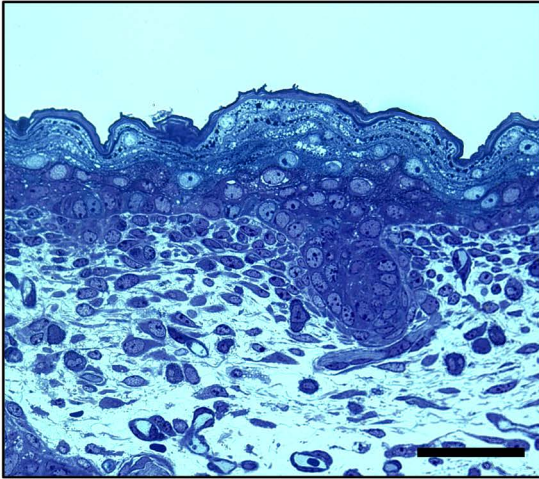

Supplemental Figure 2. Steen et al.

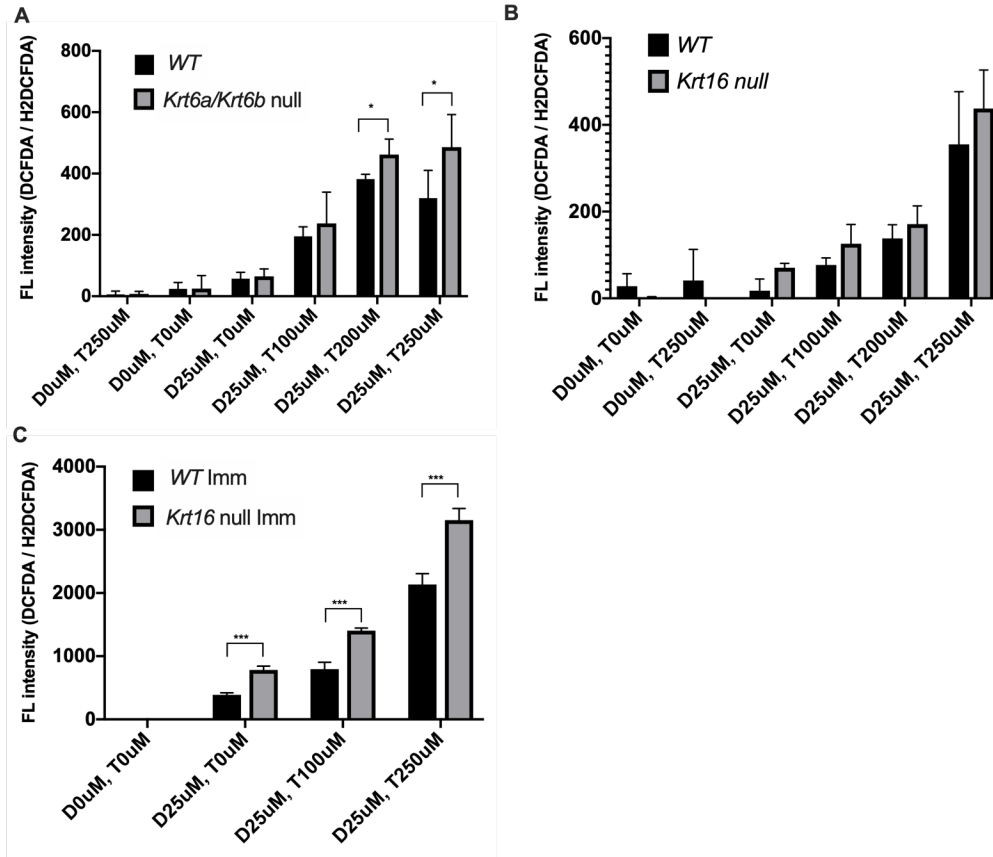

Supplemental Figure 3. Steen et al.

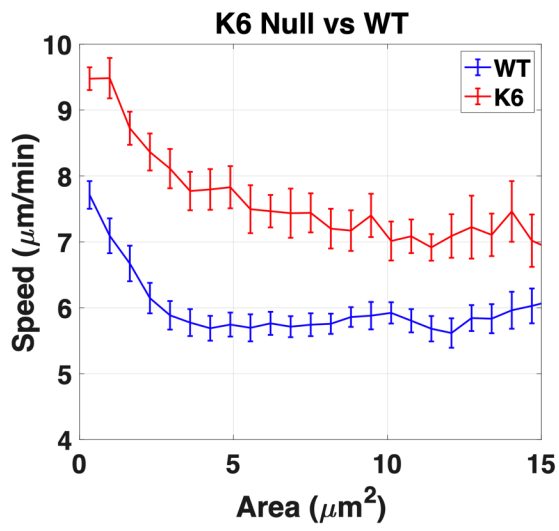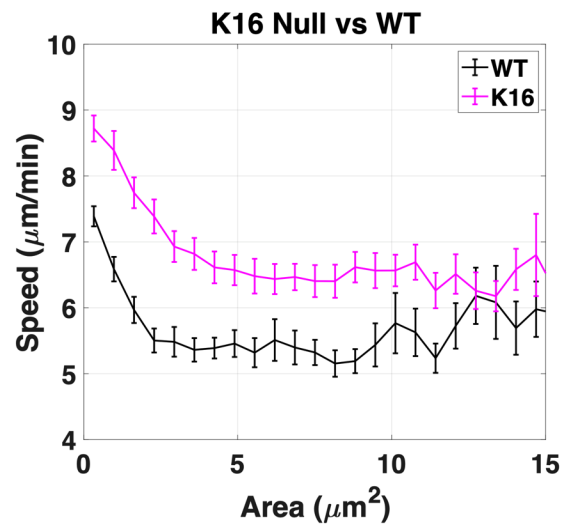

**Supplemental Table 1.** Forward and reverse oligonucleotide primers used for RT-qPCR assays (listed in order they appear in the text). \*lowercase letters represent the Flag tag sequence.

| <b>Molecule</b>                | <b>Forward (5' – 3')</b> | <b>Reverse (5' – 3')</b>         |
|--------------------------------|--------------------------|----------------------------------|
| <i>CoX4</i>                    | ATTGGCAAGAGAGCCATTCTAC   | CACGCCGATCAGCGTAAGT              |
| <i>Pyruvate Dehydrogenase</i>  | AGGAGGGAATTGAATGTGAGGT   | ACTGGCTTCTATGGCTTCGAT            |
| <i>Succinate Dehydrogenase</i> | GCTGCGTTCTTGCTGAGACA     | ATCTCCTCCTTAGCTGTGGTT            |
| <i>Tim23</i>                   | GAAGGTGGCGGAAGAAGTAGC    | GGGGGTTCATAACCAGTCAGC            |
| <i>COR2</i>                    | AAAGTTGCCCGAAGGTTAAA     | GAGCATAGTTTTCCAGAGAAGCA          |
| <i>Drp1</i>                    | CCAGCTGCCTCAGATCGTCG     | CCGGGTGACCACACCAGTTC             |
| <i>Mfn1</i>                    | CGTCGAGAACCTCCATGGGC     | TCGTCCACGTCAGCCTCTCA             |
| <i>Mfn2</i>                    | CTGGGCCCAAGAATAGCCG      | GCGATGAGTCTCCAGCCCAC             |
| <i>Opa1</i>                    | AGGGTCCGGCGAGATGATGA     | CACCATCCTCTGCAGCCCAG             |
| <i>K16-flag*</i>               | CACCCAGCATGGCCACCT       | TTActatcgtcgtcatccttgaatcGTCCTGG |
